# Supplementary material for: Feeling Connected to Nature Attenuates the Association Between Complicated Grief and Mental Health
Source: Preprints.org preprint supplement (doi:10.20944/preprints202407.1415.v1), 2024-07-17
Supplement: Supplementary file 1 [file supplementary]

Gender (1=male, 2 = female, 3 = other, 4 = decline to state)	Age	RaceEthnicity (1 = White/European American, 2 = American Indian or Alaska Native, 3 = Asian American or Pacific Islander, 4 = Black/African American, 5 = Hispanic/Latino, 6 = Middle Eastern or Arab American, 7 = Other)	BGQ_1	BGQ_2	BGQ_3	BGQ_4	BGQ_5	Sum_BGQ	BEQ_1	BEQ_2	BEQ_3	BEQ_4	BEQ_5	BEQ_6	BEQ_7	BEQ_8	BEQ_9	BEQ_10	BEQ_11	BEQ_12	BEQ_13	BEQ_14	BEQ_15	BEQ_16	BEQ_17	BEQ_18	BEQ_19	BEQ_20	BEQ_21	BEQ_22	BEQ_23	BEQ_24	Avg_BEQ	GAD_1	GAD_2	GAD_3	GAD_4	GAD_5	GAD_6	GAD_7	Sum_GAD	Dep_1	Dep_2	Dep_3	Dep_4	Dep_5	Dep_6	Dep_7	Dep_8
2	23	1	0	0	0	0	1	1	1	1	1	1	1	1	1	1	1	1	1	1	1	3	1	1	1	1	1	1	1	1	1	2	1.13	1	0	0	1	0	1	0	3	1	1	1	1	1	1	1	1
1	60	1	0	0	0	1	0	1	1	1	1	1	1	1	1	1	1	1	1	1	1	2	1	1	1	1	1	1	1	1	1	1	1.04	0	0	0	0	0	0	0	0	1	1	1	1	1	1	1	1
2	41	1	2	2	2	2	2	10	1	1	1	4	1	3	1	3	1	1	1	1	1	1	1	1	1	1	1	1	1	1	1	1	1.29	0	0	0	0	0	1	0	1	1	1	4	1	1	1	1	1
2	25	1	1	1	1	1	1	5	3	3	2	2	2	4	3	3	2	2	3	3	3	3	2	2	1	2	3	2	2	3	2	1	2.42	2	2	3	2	1	1	2	13	3	3	3	3	3	3	3	3
1	30		1	0	1	0	0	2	1	1	1	2	1	1	1	2	2	1	4	1	1	1	2	1	1	1	2	1	1	1	1	2	1.38	1	1	2	3	1	1	0	9	4	3	5	3	3	5	4	3
2	38	1	2	2	2	1	1	8	1	3	1	4	1	2	2	3	2	2	1	1	1	4	3	1	3	2	2	1	4	1	3	1	2.04	2	2	2	3	0	3	1	13	1	3	3	3	1	3	3	2
2	56	1	1	0	1	1	0	3	1	1	1	2	1	1	1	1	1	3	3	1	1	1	1	1	1	1	1	2	3	1	1	1	1.33	1	1	1	1	1	1	1	7	1	1	1	1	1	1	1	1
1	66	1	0	0	0	0	0	0	1	1	1	1	1	1	1	1	1	1	1	1	1	1	1	1	1	1	1	1	1	1	1	1	1	0	0	0	0	0	0	0	0	1	1	1	1	1	1	1	1
1	36	1	2	1	2	2	1	8	1	1	3	1	2	2	1	1	2	1	1	1	3	1	4	3	3	2	2	2	3	3	2	2	1.96	3	1	3	3	3	3	3	19	2	3	2	3	3	2	3	4
2	48	1	1	1	1	0	0	3	1	1	1	2	1	1	1	1	1	2	1	1	1	2	1	1	1	1	1	1	1	2	1	1	1.17	0	0	0	0	0	0	0	0	1	1	1	1	1	1	1	1
2	57		1	1	1	2	0	5	1	1	1	4	1	1	1	1	1	1	1	1	1	1	1	1	1	1	1	1	1	1	1	1	1.13	0	0	0	0	0	0	0	0	1	1	1	1	1	1	1	1
2	23	1	1	1	2	1	2	7	3	1	1	3	2	4	3	4	4	1	1	1	1	4	3	1	2	2	3	1	4	1	1	1	2.17	1	2	2	2	0	1	3	11	4	3	4	4	5	4	5	3
2	31	1	0	0	1	0	0	1	3	1	1	2	1	1	1	1	4	1	3	2	2	1	2	1	2	2	2	1	1	1	1	1	1.58	1	0	1	1	2	1	0	6	3	3	3	3	3	2	3	2
1	33	1	1	1	0	0	0	2	1	1	1	2	1	1	1	1	1	1	1	1	1	1	1	2	2	2	2	1	1	1	1	1	1.21	0	0	0	0	0	1	0	1	2	1	3	1	4	3	2	2
2	40	1	2	1	1	1	2	7	3	3	3	4	3	3	2	2	2	3	3	3	2	2	1	1	1	2	2	1	1	1	2	3	2.21	0	0	0	1	1	2	2	6	3	3	4	4	3	2	2	3
1	44		0	1	1	1	1	4	1	1	1	2	1	2	1	2	1	1	2	1	1	2	1	1	1	1	1	1	1	1	1	1	1.21	0	0	1	1	0	0	0	2	1	1	3	2	2	3	2	1
2	29	1	1	1	0	0	0	2	1	1	1	4	1	2	1	2	1	3	4	1	1	2	1	1	1	1	1	1	2	1	1	1	1.5	1	1	1	2	0	1	0	6	2	1	2	1	1	3	2	1
1	37	1	0	0	0	1	1	2	2	2	3	2	2	3	2	3	2	2	2	3	3	2	2	2	3	2	3	2	2	2	2	4	2.38	2	2	2	2	2	2	0	12	1	2	3	2	2	3	3	2
1	58	1	0	0	0	0	0	0	1	1	1	3	1	1	1	1	1	1	1	1	1	3	1	1	1	1	1	1	1	1	1	1	1.17	0	0	0	0	0	0	0	0	1	1	1	1	1	1	1	1
2	36	1	1	2	2	2	1	8	3	3	4	4	4	3	4	4	4	4	3	3	4	4	4	4	4		3	4	3	4	4	4	3.7	3	3	2	2	2	3	3	18	5	5	5	4	4	4	5	4
2	57	1	0	0	0	0	0	0	1	1	1	1	1	1	1	1	1	1	3	1	1	1	1	1	1	1	1	1	1	1	1	1	1.08	0	0	1	0	0	0	0	1	1	1	1	1	1	1	1	1
2	49		0	0	1	0	0	1	1	1	1	2	2	1	1	1	1	2	2	2	1	3	2	1	1	1	2	1	1	1	1	1	1.38	0	0	0	0	0	0	0	0	1	2	1	1	1	1	1	1
1	47	1	1	1	1	1	1	5	1	1	1	3	1	1	1	1	1	1	2	2	1	1	1	1	1	1	1	1	1	1	1	1	1.17	1	1	0	0	1	1	1	5	1	1	1	1	1	1	1	1
2	35	5	2	1	0	0	0	3	1	1	1	3	1	1	1	1	2	3	3	4	1	3	1	1	1	2	1	1	2	1	1	1	1.58	1	1	1	1	0	0	0	4	1	1	3	3	3	3	3	2
2	54	1	2	2	2	2	2	10	3	4	1	4	3	1	4	3	4	3	1	4	1	4	4	1	3	3	3	4	4	4	3	1	2.92	3	3	3	3	3	3	3	21	2	4	4	3	3	4	4	5
1	36	1	1	1	1	1	1	5	1	2	1	2	1	1	2	2	2	2	3	1	2	3	2	2	2	2	2	1	2	2	2	1	1.79	1	1	1	1	1	1	1	7	2	2	2	2	2	2	2	2
2	30	5	0	1	0	0	0	1	1	2	1	3	1	3	1	3	2	1	2	1	1	4	2	1	1	1	1	1	3	1	1	1	1.63	0	0	0	1	0	2	0	3	1	1	2	1	1	3	2	2
2	38	5	2	1	1	1	1	6	2	1	1	2	2	2	2	2	2	2	2	1	1	2	2	1	1	1	3	1	2	3	1	1	1.67	1	1	1	1	1	1	1	7	2	3	3	3	2	3	3	3
1	40	1	1	1	0	2	0	4	1	1	1	2	1	1	1	2	1	2	1	1	2	2	1	1	1	1	1	1	1	1	1	1	1.21	1	0	0	1	1	0	0	3	1	1	1	1	1	1	1	1
2	33	1	1	1	1	0	2	5	3	1	1	3	1	3	1	4	4	1	3	4	4	4	4	1	4	4	1	1	3	3	3	1	2.58	3	3	3	3	3	3	3	21	3	5	5	5	4	4	4	4
2	40	1	0	1	1	0	0	2	1	2	1	2	3	1	1	1	1	2	4	1	1	2	1	1	1	1	1	1	2	1	1	1	1.42	1	1	1	1	0	1	0	5	1	1	1	1	1	1	1	1
2	37		1	0	0	0	1	2	1	1	1	3	1	1	1	1	1	2	2	2	1	2	1	1	1	1	2	1	1	1	1	1	1.29	1	0	1	1	0	0	0	3	1	1	1	1	1	1	1	1
2	28	1	1	1	1	0	0	3	1	1	1	1	1	2	1	2	2	1	3	1	1	2	2	1	1	1	1	3	2	2	1	1	1.46	3	2	3	2	2	2	1	15	1	2	4	2	3	4	4	3
2	26	3	2	2	2	1	2	9	3	3	3	3	3	3	3	3	3	3	3	3	4	3	3	4	2	2	2	2	4	2	2	2	2.83	0	0	0	0	0	1	0	1	2	2	2	2	2	2	2	2
1	28	4	2	2	2	1	1	8	3	4	4	4	4	3	3	3	3	4	4	4	3	2	3	4	4	4	4	3	2	3	3	4	3.42	2	3	2	2	3	3	1	16	3	5	5	5	4	2	3	3
1	70	1	0	0	1	1	1	3	1	1	1	3	1	1	1	1	1	1	2	1	1	2	1	1	2		1	1	1	1	1	1	1.22	0	0	0	0	0	0	0	0	1	1	2	1	2	2	1	1
2	80	1	1	2	1	2	1	7	1	3	1	4	1	2	1	2	3	4	3	1	1	4	2	1	1	1	2	1	3	1	2	1	1.92	1	0	0	1	0	0	0	2	1	1	1	2	1		1	2
1	26	4	1	1	2	1	1	6	1	3	1	3	1	1	1	2	3	3	3	4	3	4	3	3	1	2	3	4	3	3	2	1	2.42	0	0	0	0	0	1	0	1	1	2	1	1	1	1	1	1
2	42	1	1	0	0	0	0	1	1	1	1	1	1	1	1	1	1	2	1	1	1	3	1	1	1	1	1	1	3	1	1	1	1.21	0	0	1	0	0	1	0	2	1	1	1	1	1	3	1	1
1	57	1	1	1	1	0	0	3	2	3	1	2	1	1	1	1	1	1	2	1	2	2	2	1	1	1	2	2	2	1	1	1	1.46	1	0	0	1	0	0	0	2	2	2	2	1	1	3	3	4
2	59	1	2	1	2	1	1	7	1	2	1	3	2	2	2	2	2	3	2	2	1	4	2	1	1	1	1	1	1	1	3	2	1.79	1	0	0	1	0	0	0	2	1	1	3	1	1	1	1	1
2	36	1	2	1	0	2	1	6	1	4	1	4	1	2	2	2	3	4	4	1	1	4	2	1	3	4	4	3	3	1	1	1	2.38	0	0	0	0	0	0	0	0	1	1	1	1	1	1	1	1
2	33	1	1	1	0	1	1	4	1	2	1	3	1	1	1	2	2	2	3	1	1	3	3	1	1	1	1	1	2	2	2	1	1.63	1	1	2	0	0	1	1	6	1	1	1	1	1	1	1	1
1	56	1	0	1	1	0	0	2	1	1	1	3	1	1	1	1	1	2	3	3	1	2	1	1	1	1	1	1	2	1	1	1	1.38	1	0	0	1	0	0	0	2	1	1	1	1	1	1	1	1
2	25	5	2	1	2	1	2	8	1	4	2	4	1	3	3	3	4	3	3	4	1	4	3	2	1	2	2	1	4	2	2	1	2.5	2	2	2	2	2	2	1	13	2	2	4	3	2	3	2	3
1		1	2	1	1	0	0	4	1	3	4	2	1	1	3	3	3	1	4	2	3	1	3	1	1	3	1	4	4	4	2	2	2.38	1	2	0	1		2	1	7	3	2	4	1	1	3	1	1
2	52	4	1	1	1	1	1	5	2	1	2	3	2	2	2	2	3	2	2	2	1	3	2	2	2	2	2	2	2	2	2	1	2	2	2	2	2	2	2	1	13	2	3	3	3	2	4	3	3
1	43	1	1	1	1	1	1	5	2	2	1	2	2	2	1	2	2	1	3	1	1	2	2	1	1	1	1	1	2	2	2	2	1.63	1	0	1	0	0	1	0	3	1	2	2	1	1	2	2	2
1	32	1	1	1	2	0	1	5	2	1	1	2	1	3	2	1	3	1	4	1	3	3	3	3	3	2	3	1	2	3	4	1	2.21	1	1	2	3	2	2	2	13	4	3	4	4	3	4	4	4
1	71	1	0	0	0	0	1	1	1	1	1	2	1	1	1	1	1	1	1	1	1	1	1	1	2	2	1	1	1	1	1	1	1.13	0	0	0	1	0	1	0	2	1	1	3	1	1	3	1	1
1	71	1	0	0	1	0	0	1	1	1	1	2	1	1	1	1	1	1	1	1	1	1	1	1	1	1	1	1	1	1	1	1	1.04	0	0	2	0	0	2	2	6	2	2	4	2	3	2	3	2
1	32	1	1	0	0	0	0	1	1	1	1	2	3	1	3	2	3	2	2	3	2	3	2	3	2	3	2	2	3	3	2	2	2.21	1	2	2	1	1	2	1	10	4	4	4	4	4	4	4	4
1	44	1	1	1	0	0	2	4	3	3	1	3	1	3	3	3	4	2	3	1	1	1	4	2	1	3	4	1	1	1	1	1	2.13	3	3	3	3	3	3	3	21	5	5	5	5	5	5	5	5
1	29	1	0	0	1	0	0	1	1	2	1	2	1	1	1	3	1	2	1	4	1	2	1	2	2	2	2	1	2	1	1	1	1.58	2	1	1	0	0	3	2	9	2	1	3	3	2	3	4	3
2	31	1	2	0	2	1	1	6	2	4	1	4	1	1	1	2	2	3	1	1	1	4	3	4	4	2	3	1	3	1	1	1	2.13	1	1	1	1	0	1	1	6	3	3	3	3	3	3	5	5
1	34	4	1	1	1	1	1	5	1	1	1	2	1	2	2	2	2	2	2	2	3	2	2	2	2	2	2	1	2	2	2	1	1.79	0	0	0	0	0	0	0	0	1	1	2	1	2	1	1	1
2	24	1	1	1	1	2	2	7	4	4	4	4	2	4	4	4	4	4	4	4	4	3	4	4	4	4	3	2	2	2	4	3	3.54	3	3	3	3	3	3	3	21	5	5	5	5	5	5	5	5
1	26	3	1	1	1	1	2	6	2	2	1	2	2	2	2	2	3	2	2	2	2	2	2	2	2	3	3	2	2	2	3	2	2.13	1	2	1	2	1	1	1	9	4	4	5	3	3	4	3	3
2	58	5	1	1	1	0	0	3	1	1	1	1	1	1	1	1	1	1	2	1	1	2	1	1	1	1	1	1	1	1	1	1	1.08	2	2	2	2	2	2	2	14	2	2	2	3	1	1	1	1
2	49	1	0	1	1	0	1	3	1	1	1	3	1	1	1	2	1	1	2	3	1	3	3	1	1	1	1	1	2	1	4	1	1.58	2	2	2	2	2	1	2	13	3	3	3	2	3	3	3	3
2	45	1	0	0	1	1	1	3	1	1	1	3	1	2	1	1	1	1	1	2	3	3	1	1	1	1	2	1	1	1	1	1	1.38	0	0	0	1	0	1	0	2	2	2	3	2	2	2	4	3
2	35	5	2	1	2	1	2	8	3	2	3	4	3	2	3	2	3	4	4	2	3	2	4	3	2	3	4	2	3	4	2	3	2.92	3	2	3	2	1	2	2	15	4	4	4	4	5	5	5	4
2	37	1	0	1	0	1	0	2	3	2	1	2	1	3	2	3	3	1	4	1	3	3	4	2	1	1	3	1	3	2	2	2	2.21	1	1	2	1	0	2	0	7	4	5	4	5	4	4	5	4
1	33	5	1	1	1	1	1	5	2	2	1	1	2	2	2	2	1	1	2	2	1	1	2	1	2	1	1	2	1	1			1.5	0	1	1	0	1	1	0	4	1	2	2	1	1	2	1	1
2	32	1	1	0	1	2	1	5	1	2	1	1	1	1	1	1	1	2	2	1	1	2	1	1	1	1	1	1	1	1	1	1	1.17	0	0	0	0	0	0	0	0	1	1	1	1	1	1	1	1
2	37	1	1	1	1	2	1	6	1	1	1	2	1	1	1	2	1	2	1	1	1	1	1	1	1	1	1	1	1	1	1	1	1.13	0	0	0	0	1	0	0	1	1	1	2	1	1	1	1	1
2	59	1	1	0	1	2	0	4	1	1	1	3	1	1	1	1	1	2	3	2	1	3	1	1	1	1	1	1	2	1	3	1	1.46	0	1	1	2	0	0	0	4	1	1	1	1	1	1	1	1
1	21	1	2	1	1	2	2	8	2	4	1	4	1	3	3	3	4	4	4	4	4	4	4	4	4	4	4	2	3	4	4	4	3.42	1	1	2	1	1	3	2	11	3	4	4	4	5	5	5	5
2	65	1	1	1	1	0	0	3	1	1	1	2	1	1	1	1	1	1	1	1	1	2	1	1	2	1	1	1	1	1	1	1	1.13	0	0	0	0	0	0	0	0	1	1	1	1	1	1	1	1
2	21	5	1	1	0	1	1	4	2	1	1	1	2	2	1	2	1	1	2	1	1	1	2	1	1	1	2	1	2	2	1	1	1.38	2	1	1	2	1	2	2	11	1	3	2	1	3	5	3	3
2	54		0	0	1	0	1	2	1	1	1	2	1	1	1	1	1	1	1	4	1	3	1	1	1	1	1	1	1	1	2	1	1.29	0	0	0	0	0	1	0	1	1	1	1	1	2	2	1	1
2	40	1	1	0	0	0	0	1	1	1	1	2	1	1	1	1	1	1	1	1	1	2	1	1	1	1	1	1	1	1	1	1	1.08	1	1	1	0	0	0	0	3	1	1	3	1	1	2	3	3
2	55	1	2	2	2	2	2	10	3	4	1	4	1	1	1	4	2	4	4	1	1	4	1	1	1	1	1	1	1	1	4	1	2	0	0	0	0	0	0	0	0	1	1	1	1	1	3	1	1
2	45	1	0	0	0	0	0	0	2	1	1	1	2	2	2	2	2	1	3	1	3	3	3	2	3	2	2	3	2	2	1	1	1.96	3	2	2	3	1	2	3	16	3	4	4	3	3	3	2	2
2	59	1	1	1	2	1	1	6	2	3	1	2	2	1	1	1	3	1	3	1	1	2	4	1	1	1	1	1	2	2	1	1	1.63	1	0	1	0	0	0	0	2	1	1	2	1	1	1	1	1
2	69	1	1	1	1	0	0	3	1	2	1	2	1	1	2	1	2	3	2	3	2	3	2	3	3	4	3	1	2	1	1	2	2	0	1	2	1	0	1	1	6	5	4	3	3	4	3	4	3
2	25	3	1	1	2	0	1	5	3	3	3	3	4	3	3	2	2	4	2	1	2	3	3	3	3	2	3	2	2	2	2	2	2.58	2	1	2	2	2	1	2	12	3	3	3	3	4	4	5	2
1	31	5	2	1	1	1	1	6	3	2	1	3	2	2	3	3	3	2	2	1	2	3	3	3	3	2	2	1	2	3	3	2	2.33	2	2	2	1	1	2	1	11	3	3		4	4	2	4	4
2	35	1	1	1	0	0	1	3	2	2	1	3	1	1	1	3	3	2	3	4	1	3	3	1	1	1	1	1	3	2	2	1	1.92	1	0	0	1	0	3	1	6	3	3	3	3	3	3	4	4
1	39	1	0	1	0	0	0	1	1	1	1	1	1	1	1	1	1	1	1	1	1	1	1	1	1	1	1	1	1	1	1	1	1	0	0	0	0	0	0	0	0	1	1	1	1	2	1	2	1
1	37	4	2	0	1	0	2	5	1	1	1	1	1	2	1	2	3	3	1	1	1	1	1	1	1	1	1	1	1	1	1	1	1.25	1	0	0	0	2	1	0	4	1	1	1	1	1	1	1	1
2	33	1	1	1	0	1	0	3	1	1	1	3	1	1	1	1	1	1	4	1	1	2	1	1	1	1	1	1	2	1	1	1	1.29	0	0	0	1	0	0	0	1	1	1	1	1	1	2	1	1
2	31	1	0	1	1	0	1	3	1	2	1	2	2	3	1	2	1	3	3	4	2	3	2	1	2	1	1	1	2	1	1	3	1.88	1	0	2	2	1	0	2	8	1	1	1	1	1	2	1	3
2	32	1	1	1	1	0	0	3	2	2	1	3	1	2	2	2	2	3	4	2	2	3	2	2	2	2	2	2	2	1	2	2	2.08	1	0	1	0	0	1	2	5	2	2	3	2	2	3	2	2
1	23	1	0	0	0	0	0	0	1	1	1	2	1	1	1	1	1	1	1	1	1	2	1	1	1	1	1	1	2	1	1	1	1.13	1	1	1	0	0	0	0	3	1	1	3	1	1	1	1	1
1	21	1	1	1	2	2	1	7	2	2	1	4	2	3	2	2	2	3	3	1	3	2	3	3	3	1	2	1	1	2	3	3	2.25	1	1	1	2	1	2	2	10	1	1	3	3	3	3	3	2
2	35	1	2	0	0	0	0	2	2	3	1	4	1	1	1	1	1	3	1	4	1	4	1	1	1	1	2	1	2	1	1	1	1.67	3	3	3	3	3	2	2	19	2	2	3	2	2	3	3	3
2	28	1	1	1	1	2	2	7	4	1	3	4	4	1	3	2	3	1	2	4	1	2	3	4	1	3	1	1	2	3	3	2	2.42	3	1	1	2	1	0	1	9	1	2	4	3	1	3	4	3
			1	2	2	1	0	6	3	1	3	4	1	4	4	4	4	2	4	1	1	4	2	2	3	4	4	1	3	4	4	1	2.83
2	29	1	1	1	1	1	1	5	2	2	1	3		3	4	3	2	1	2	1	3	2	4	4	4	4	3	1	3	4		2	2.64	1	1	1	1	0	1	1	6	3	3	3	4	4	3	4	2
2	35	1	2	2	2	1	1	8	2	3	1	4	2	3	3	3	4	2	1	4	1	4	2	1	1	1	2	2	4	1	2	1	2.25	2	1	1	1	0	1	0	6	1	3	3	2	1	3	1	1
2	21	5	1	2	1	2	2	8	4	4	3	4	3	4	4	4	4	1	1	4	3	3	4	4	4	2	2	1	4	3	3	3	3.17	2	2	2	2	1	1	2	12	3	5	5	4	3	4	4	4
2	32	3	0	1	0	2	0	3	1	2	1	3	1	2	1	2	2	1	4	3	1	2	3	1	1	2	1	4	3	1	2	1	1.88	1	1	1	1	0	1	0	5	2	2	4	2	3	3	1	1
2	51	1	1	1	2	1	1	6	1	2	2	2	1	1	2	2	2	3	2	1	1	4	2	2	3	4	2	1	2	1	4	1	2	1	0	1	0	0	1	1	4	1	1	2	1	1	3	1	1
2	39	5	2	1	1	1	1	6	2	4	1	3	1	4	3	3	3	1	4	2	2	4	2	2	1	2	2	4	4	3	4	1	2.58	3	2	2	3	1	1	3	15	2	3	4	3	3	4	3	3
2	61	1	0	2	2	0	2	6	1	1	1	4	1	2	4	4	4	4	4	2	1	4	4		1	1	2	1	4	1	1	1	2.3	3	2	3	3	3	3	0	17	3	2	3	2	2	4	1	2
2	37	1	2	2	2	1	1	8	3	4	3	4	3	4	4	3	3	2	2	4	2	4	4	4	1	2	3	3	4	3	4	1	3.08	3	3	3	3	2	3	2	19	4	4	5	4	3	4	4	3
2	37	1	2	2	2	2	2	10	4	4	4	4	1	4	1	4	4	4	1	4	4	4	4	4	4	4	4	4	4	4	4	1	3.5	3	2	3	3	3	3	2	19	4	4	5	5	5	5	5	3
2	38	1	2	1	1	1	1	6	2	4	3	4	3	4	4	2	4	4	3	4	4	4	2	3	4	4	4	1	4	1	4	1	3.21	3	3	3	3	3	3	3	21	5	5	3	4	5	3	3	3
2	28	5	2	1	1	1	2	7	4	4	1	4	2	3	4	4	4	4	3	1	1	4	4	1	1	3	4	1	4	4	4	1	2.92	2	1	1	2	0	1	0	7	2	2	5	4	3	5	3	5
2	61	1	1	0	1	2	0	4	1	2	3	4	1	1	1	1	1	1	1	4	1	2	1	3	1	2	1	1	1	1	2	1	1.58	0	0	0	0	0	0	0	0	1	1	3	1	1	3	1	1
2	58	1	2	2	2	1	1	8	2	4	3	4	4	3	2	3	3	2	2	4	4	4	4	4	4	4	1	1	3	2	1	2	2.92	2	2	2	2	1	2	3	14	2	3	3	3	3	3	3	3
2	30	1	2	2	1	2	2	9	3	4	2	4	1	4	3	3	3	2	2	3	4	3	4	3	4	4	3	1	4	3	4	1	3	2	2	2	3	2	3	3	17	4	4	4	4	4	4	4	4
2	42	5	2	1	2	1	2	8	2	2	4	3	4	2	2	2	3	1	3	4	4	4	4	3	3	4	4	4	4	3	3	3	3.13	2	2	2	2	2	3	3	16	3	5	4	4	3	4	3	4
2	61	1	2	2	2	0	1	7	1	4	4	4	1	3	3	2	4	2	1	3	1	4	3	3	1	2	1	1	4	1	1	1	2.29	3	3	3	3	3	3	3	21	1	4	4	4	1	4	3	4
2	33	5	2	2	2	2	2	10	3	4	1	4	2	2	4	4	4	2	2	4	3	4	4	4	4	4	4	1	4	3	4	1	3.17	3	3	3	3	3	3	3	21	3	4	5	4	4	5	3	5
2	58	1	1	1	2	1	1	6	2	1	1	4	1	2	1	2	4	1	1	4	1	4	4	1	1	1	1	1	4	1	2	4	2.04	1	1	1	1	0	1	0	5	1	3	3	2	1	4	3	3
2	59	1	2	2	2	2	2	10	2	1	2	4	3	3	1	3	3	4	1	3	2	1	3	1	1	1	1	1	4	1	2	1	2.04	0	0	0	0	0	2		2	1	1	1	1	1	1	1	1
2	41	1	1	2	2	2	1	8	2	2	1	2	1		3	1	3	3	4	3	1	3	3	3	3	3	3	1	3	3	1	1	2.3	1	2	3	2	2	3	3	16	2	3	4	4	2	4	3	4
2	66	1	1	2	1	1	1	6	1	1	1	2	1	1	1	2	2	1	1	1	2	2	2	1	1	1	1	1	1	1	1	1	1.25	0	0	0	1	0	1	0	2	2	2	3	1	1	3	1	1
2	60	1	0	1		2	2	5	3	2	3	4		4	4	3	4	4	4	4	4	4	4	4	4	3	4	4	4	3	4	3	3.65	3	3	3	2	3	3	2	19	4	3	3	3	3	3	3	3
2	43	1	0	1	2	1	1	5	1	1	1	4	1	1	1	1	3	3	3	3	1	3	3	3	1	1	1	1	1	1	3	1	1.79	2	2	2	2	2	2	2	14	1	1	3	1	1	3	1	1
1	58	1	0	1	0	0	0	1	1	1	1	2	1	1	1	1	1	1	2	1	1	2	1	1	1	1	1	1	2	1	1	1	1.17	0	0	0	1	1	1	0	3	1	1	2	1	1	3	1	1
2	52	1	2	1	2	0	0	5	1	1	1	4	1	3	1	2	4	3	4	1	1	3	2	1	1	1	1	1	3	1	1	1	1.79	0	2	2	2	1	0	1	8	1	1	4	2	1	4	2	2
2	56	1	1	2	2	2	2	9	2	4	2	4	2	3	4	4	4	1	3	2	3	4	4	2	4	3	4	2	4	4	3	1	3.04	3	2	2	2	1	1	3	14	3	4	4	4	4	4	4	3
2	33	1	0	1	0	0	0	1	1	2	1	3	2	2	1	2	2	3	4	4	1	4	2	1	1	2	2	1	2	1	1	1	1.92	1	1	1	1	0	0	0	4	1	1	2	2	1	4	2	3
1	27	4	1	1	1	0	0	3	1	1	1	3	1	1	1	1	1	2	4	1	1	4	1	1	1	2	2	1	2	1	1	1	1.5	0	0	0	0	0	1	1	2	1	1	2	1	1	2	2	2
1	60	1	1	1	2	1	2	7	3	1	3	4	2	2	2	4	3	1	2	4	2	2	3	4	4	3	4	2	4	1	3	2	2.71	1	0	0	1	0	0	1	3	1	1	4	1	2	2	2	2
2	53	1	0	0	0	0	0	0	1	1	1	1	1	1	1	1	1	2	2	2	1	2	1	1	1	1	1	1	1	1	1	1	1.17	0	0	0	0	0	0	0	0	1	1	1	1	1	1	1	1
1	64	1	0	1	0	0	1	2	2	1	1	1	1	2	2	2	2	1	2	1	1	1	2	1	2	2	1	1	1	1	1	1	1.38	0	0	0	0	0	1	1	2	1	2	4	3	3	2	3	2
1	32	4	2	2	2	1	1	8	3	3	3	2	4	2	1	3	3	2	3	4	2	4	2	3	2	4	2	4	3	2	3	3	2.79	1	2	2	2	2	1	2	12	3	4	4	3	3	4	4	4
2	57	1	2	1	2	1	1	7	1	2	1	4	2	3	3	2	4	2	4	2	3	3	4	3	3	3	2	2	3	3	3	1	2.63	3	3	3	3	1	3	1	17	2	3	4	3	2	3	2	4
2	31		2	1	1	2	0	6	2	3	3	4	1	4	2	2	4	2	4	4	1	4	4	4	4	4	4	4	4	1	3	1	3.04	0	0	0	0	0	0	0	0	1	1	3	1	1	3	1	3
2	52	1	1	0	1	0	1	3	1	1	1	2	1	1	1	2	1	2	3	1	1	3	2	1	1	1	2	1	3	1	2	1	1.5	1	0	0	0	0	0	0	1	1	1	2	1	1	2	1	1
2	37	1	1	0	1	0	2	4	2	3	1	3	1	1	1	2	2	3	4	4	1	2	2	1	1	1	1	1	2	2	2	1	1.83	2	2	2	3	2	1	3	15	3	4	4	4	4	4	3	3
1	36	5	0	1	0	0	1	2	1	1	1	4	1	1	1	1	3	3	4	1	1	3	1	1	3	3	1	1	3	4	4	1	2	3	3	3	3	3	3	2	20	4	4	5	4	5	1	1	1
1	36	1	1	1	1	0	0	3	3	1	1	1	1	1	1	1	1	1	1	4	1	1	2	2	1	1	1	3	1	1	1	2	1.42	1	1	1	1	1	1	1	7	4	4	4	4	5	4	5	4
2	69	1	1	0	0	0	0	1	1	1	1	2	1	1	1	1	2	1	1	1	3	3	1	1	2	1	3	1	1	1	3	1	1.46	0	0	0	1	0	1	0	2	1	2	2	2	2	2	3	2
1	25	1	1	0	0	1	0	2	2	1	1	2	1	1	1	2	1	1	2	1	1	1	1	1	1	2	1	1	1	1	1	1	1.21	0	0	0	1	1	0	0	2	2	3	3	4	3	3	4	2
2	47	4	0	0	0	0	1	1	1	1	1	1	1	2	1	1	1	1	2	1	1	2	1	1	1	1	1	1	1	1	1	1	1.13	0	0	0	0	0	0	0	0	1	1	2	2	2	2	2	2
2	40	4	2	2	1	2	2	9	3	4	1	2	2	3	4	4	4	3	4	1	3	2	4	2	1	1	3	2	3	4	2	3	2.71	1	2	0	2	2	0	1	8	3	4	4	5	3	5	4	4
2	58	1	1	0	0	0	0	1	1	2	1	4	1	1	1	1	1	4	4	3	1	4	1	1	3	3	1	2	1	1	4	1	1.96	0	0	1	1	0	0	1	3	1	3	1	1	1	2	1	1
1	27	1	1	1	1	0	1	4	1	2	1	2	1	1	1	1	1	3	2	1	2	3	2	2	2	2	2	1	2	2	1	1	1.63	0	0	1	0	0	0	0	1	1	2	2	1	1	2	1	1
2	37	1	1	1	1	0	0	3	1	3	1	2	1	1	1	1	1	1	2	3	1	2	2	1	2	1	1	1	2	1	2	1	1.46	1	1	1	0	0	1	0	4	4	3	3	2	4	4	3	4
2	59	4	2	0	1	0	2	5	1	1	1	4	1	1	3	1	3	4	4	1	1	3	2	1	4	1	3	1	3	1	1	1	1.96	1	1	1	0	0	1	0	4	1	1	2	1	1	1	1	1
2	38	4	2	2	2	2	2	10	4	4	1	4	4	4	4	4	4	4	4	4	4	4	4	4	4	4	4	4	4	4	4	4	3.88	2	3	2	2	3	2	3	17	4	5	3	4	4	3	4	5
2	59	1	1	1	1	0	0	3	1	2	1	3	1	2	1	2	2	3	2	1	1	3	2	1	1	1	1	1	2	1	1	1	1.54	0	0	0	0	0	1	0	1	1	1	2	1	1	1	1	1
2	44		0	1	1	0	0	2	1	2	1	2	1	1	1	1	2	2	2	1	1	2	2	1	1	1	1	1	1	2	1	1	1.33	3	3	3	3	2	2	2	18	4	4	4	4	4	4	4	4
2	62	1	1	1	2	2	1	7	1	1	1	3	1	1	1	2	1	1	1	1	1	2	2	1	1	1	1	1	2	1	2	1	1.29	2	1	1	2	2	1	0	9	1	3	4	1	1	4	1	2
2	38	1	1	1	1	1	1	5	2	2	2	3	2	2	2	3	2	2	2	2	2	2	3	2	2	2	2	3	2	2	2	2	2.17	1	1	1	1	1	1	1	7	3	2	2	2	3	3	3	3
1	66	1	1	1	0	0	0	2	1	1	1	2	1	1	1	1	1	1	2	1	1	3	1	1	1	1	1	1	2	1	1	1	1.21	1	0	0	0	1	0	1	3	1	1	2	1	1	2	1	1
2	30	1	1	0	0	1	0	2	1	1	1	3	1	1	1	1	1	1	2	2	1	3	1	1	1	1	1	3	2	1	2	1	1.42	2	0	2	3	1	1	0	9	1	2	2	2	2	2	1	1
2	30	1	0	1	1	0	1	3	2	1	1	4	1	3	1	2	1	1	4	4	1	4	3	1	1	1	1	1	2	2	2	1	1.88	1	0	1	1	0	0	0	3	2	2	3	3	3	3	3	1
2	24	1	1	1	2	0	1	5	1	1	1	4	1	1	1	1	2	1	1	1	1	4	2	2	2	2	2	1	4	1	1	1	1.63	0	1	1	1	0	0	1	4	1	1	1	1	1	1	1	1
2	38	1	0	0	0	1	0	1	1	1	2	1	1	2	1	1	2	1	3	4	1	3	2	1	1	1	1	4	1	1	1	1	1.58	2	2	2	3	1	1	2	13	1	2	1	2	2	3	1	1
2	29	1	1	1	2	2	2	8	1	2	1	4	1	2	2	3	2	1	4	1	1	3	3	1	2	1	2	1	3	3	2	1	1.96	2	1	1	1	0	1	2	8	1	2	3	2	1	4	1	2
2	68	1	2	0	0	0	0	2	1	1	1	2	1	1	1	1	1	1	2	4	1	3	1	1	1	1	1	1	2	1	1	1	1.33	1	0	1	1	0	0	1	4	1	1	2	1	1	1	1	1
2	44	1	0	0	0	0	0	0	1	2	1	1	1	1	1	1	1	1	2	1	1	1	1	1	1	1	1	2	1	1	1	1	1.13	1	1	1	1	1	1	1	7	1	1	1	1	2	2	1	1
2	40	1	1	2	1	2	1	7	2	2	1	2	1	3	2	3	3	3	3	1	4	4	4	3	4	3	3	1	3	1	3	3	2.58	1	1	3	2	2	3	1	13	2	3	4	5	4	3	4	4
2	31	1	0	0	0	0	1	1	1	1	1	2	1	1	1	1	2	1	3	1	1	2	3	1	2	1	3	2	1	3	1	1	1.54	2	2	2	1	1	0	2	10	3	2	4	4	4	4	4	3
2	48	1	1	1	1	1	0	4	1	2	2	4	1	3	1	2	2	1	2	3	1	3	2	1	1	1	1	1	2	1	2	1	1.71	0	0	0	0	0	0	0	0	1	1	4	1	1	3	2	3
2	24	1	0	0	1	1	0	2	1	1	1	3	1	1	1	1	2	1	3	2	1	3	2	1	1	1	3	1	3	1	2	1	1.58	0	0	1	0	0	1	0	2	1	2	3	2	2	3	3	3
2	24	1	1	1	1	0	0	3	1	1	1	4	1	1	1	1	1	3	4	2	1	4	1	1	2	1	1	1	2	2	1	1	1.63	0	0	0	0	0	0	0	0	1	1	1	1	1	1	1	1
[truncated: 24 more columns]
